# Supplementary material for: CompaRNA: a server for continuous benchmarking of automated methods for RNA secondary structure prediction
Source: PubMed Central journal article supplement — Nucleic Acids Res. 2013 Feb 21;41(7):4307–23. doi: 10.1093/nar/gkt101 (PMC3627593; doi:10.1093/nar/gkt101), 2013-02-21
Supplement: supp_gkt101_nar-03098-r-2012-File007.pdf [file supp_gkt101_nar-03098-r-2012-File007.pdf]

## **Classification of 121 RNA sequences from the PDB dataset based on the assignment of individual record to Rfam families using the Rfam on-line search engine:**

|                           |                                                                                                    |
|---------------------------|----------------------------------------------------------------------------------------------------|
| <b>tRNA</b>               | <b>11</b> (2ZZM_B, 2ZZN_D, 2XQD_Y, 2WWQ_V, 3AKZ_H, 3UZL_B, 3AMU_B, 3A2K_C, 3JYV_7, 2WRQ_Y, 3J16_L) |
| <b>K10_TLS</b>            | <b>5</b> (2KUW_A, 2KUR_A, 2KUU_A, 2KUV_A, 2KE6_A)                                                  |
| <b>5S_rRNA</b>            | <b>5</b> (3G4S_9, 3O58_2, 4A1C_3, 3JYX_3, 3IZF_C)                                                  |
| <b>Purine</b>             | <b>3</b> (3LA5_A, 3RKF_A, 3IVN_B)                                                                  |
| <b>SAM</b>                | <b>3</b> (4AOB_A, 3GX2_A, 3NPB_A)                                                                  |
| <b>5_8S_rRNA</b>          | <b>3</b> (3O58_3, 4A1C_2, 3JYX_4)                                                                  |
| <b>crcB</b>               | <b>2</b> (4ENC_A, 4ENB_A)                                                                          |
| <b>Bacteria_small_SRP</b> | <b>2</b> (2XXA_G, 2XKV_B)                                                                          |
| <b>Gammaretro_CES</b>     | <b>2</b> (2L1F_A, 2L1F_B)                                                                          |
| <b>tmRNA</b>              | <b>2</b> (3IYQ_A, 3IZ4_A)                                                                          |
| <b>ykoK</b>               | <b>1</b> (3PDR_A)                                                                                  |
| <b>HIV_FE</b>             | <b>1</b> (2L94_A)                                                                                  |
| <b>IRE_II</b>             | <b>1</b> (3SN2_B)                                                                                  |
| <b>c-di-GMP-I</b>         | <b>1</b> (3IWN_A)                                                                                  |
| <b>tRNA-Sec</b>           | <b>1</b> (3A3A_A)                                                                                  |
| <b>mir-2985-2</b>         | <b>1</b> (2L3J_B)                                                                                  |
| <b>THF</b>                | <b>1</b> (3SD1_A)                                                                                  |
| <b>mir-TAR</b>            | <b>1</b> (2KDQ_B)                                                                                  |
| <b>7SK</b>                | <b>1</b> (2KX8_A)                                                                                  |
| <b>GP_knot1</b>           | <b>1</b> (2LC8_A)                                                                                  |
| <b>Not assigned</b>       | <b>73</b>                                                                                          |
| <b>Total:</b>             | <b>121 RNA chains</b>                                                                              |

## Classification of 1987 RNA sequences from the RNAstrand dataset based on the assignment of individual record to Rfam families using the Rfam on-line search engine:

**tmRNA** 232 (TMR\_00588, TMR\_00155, TMR\_00603, TMR\_00093, TMR\_00007, TMR\_00422, TMR\_00150, TMR\_00332, TMR\_00109, TMR\_00698, TMR\_00378, TMR\_00563, TMR\_00501, TMR\_00262, TMR\_00686, TMR\_00306, TMR\_00082, TMR\_00571, TMR\_00522, TMR\_00144, TMR\_00457, TMR\_00298, TMR\_00460, TMR\_00076, TMR\_00180, TMR\_00472, TMR\_00584, TMR\_00576, TMR\_00152, TMR\_00173, TMR\_00261, TMR\_00580, TMR\_00706, TMR\_00503, TMR\_00562, TMR\_00430, TMR\_00224, TMR\_00398, TMR\_00451, TMR\_00617, TMR\_00478, TMR\_00047, TMR\_00083, TMR\_00372, TMR\_00439, TMR\_00465, TMR\_00366, TMR\_00540, TMR\_00358, TMR\_00404, TMR\_00257, TMR\_00498, TMR\_00131, TMR\_00146, TMR\_00116, TMR\_00030, TMR\_00683, TMR\_00376, TMR\_00626, TMR\_00008, TMR\_00352, TMR\_00393, TMR\_00375, TMR\_00604, TMR\_00166, TMR\_00119, TMR\_00164, TMR\_00302, TMR\_00346, TMR\_00560, TMR\_00305, TMR\_00092, TMR\_00296, TMR\_00519, TMR\_00409, TMR\_00274, TMR\_00609, TMR\_00680, TMR\_00611, TMR\_00057, TMR\_00055, TMR\_00038, TMR\_00194, TMR\_00143, TMR\_00702, TMR\_00102, TMR\_00124, TMR\_00073, TMR\_00395, TMR\_00345, TMR\_00259, TMR\_00432, TMR\_00096, TMR\_00703, TMR\_00103, TMR\_00227, TMR\_00625, TMR\_00148, TMR\_00184, TMR\_00624, TMR\_00559, TMR\_00357, TMR\_00469, TMR\_00279, TMR\_00248, TMR\_00081, TMR\_00204, TMR\_00696, TMR\_00182, TMR\_00223, TMR\_00415, TMR\_00614, TMR\_00458, TMR\_00616, TMR\_00615, TMR\_00427, TMR\_00125, TMR\_00711, TMR\_00408, TMR\_00234, TMR\_00520, TMR\_00623, TMR\_00331, TMR\_00012, TMR\_00419, TMR\_00136, TMR\_00566, TMR\_00337, TMR\_00067, TMR\_00051, TMR\_00118, TMR\_00165, TMR\_00681, TMR\_00042, TMR\_00239, TMR\_00374, TMR\_00411, TMR\_00028, TMR\_00065, TMR\_00158, TMR\_00160, TMR\_00553, TMR\_00142, TMR\_00139, TMR\_00101, TMR\_00017, TMR\_00448, TMR\_00300, TMR\_00278, TMR\_00117, TMR\_00228, TMR\_00353, TMR\_00064, TMR\_00599, TMR\_00423, TMR\_00441, TMR\_00687, TMR\_00600, TMR\_00384, TMR\_00433, TMR\_00035, TMR\_00111, TMR\_00199, TMR\_00340, TMR\_00034, TMR\_00046, TMR\_00080, TMR\_00168, TMR\_00062, TMR\_00137, TMR\_00383, TMR\_00712, TMR\_00443, TMR\_00568, TMR\_00502, TMR\_00586, TMR\_00605, TMR\_00596, TMR\_00579, TMR\_00541, TMR\_00528, TMR\_00429, TMR\_00581, TMR\_00123, TMR\_00348, TMR\_00570, TMR\_00587, TMR\_00612, TMR\_00207, TMR\_00399, TMR\_00156, TMR\_00106, TMR\_00334, TMR\_00343, TMR\_00341,

TMR\_00240, TMR\_00061, TMR\_00289, TMR\_00140, TMR\_00048,  
TMR\_00544, TMR\_00159, TMR\_00606, TMR\_00226, TMR\_00317,  
TMR\_00280, TMR\_00301, TMR\_00183, TMR\_00699, TMR\_00127,  
TMR\_00594, TMR\_00179, TMR\_00128, TMR\_00310, TMR\_00135,  
TMR\_00271, TMR\_00049, TMR\_00283, TMR\_00499, TMR\_00290,  
TMR\_00716, TMR\_00431, TMR\_00196, TMR\_00547, TMR\_00036,  
TMR\_00610, TMR\_00193, TMR\_00238, TMR\_00018, TMR\_00014,  
TMR\_00010, TMR\_00601)

**tRNA**

226 (SPR\_00412, SPR\_00116, SPR\_00476, SPR\_00417, SPR\_00882,  
SPR\_00722, SPR\_00230, SPR\_00314, SPR\_00315, SPR\_00295, SPR\_00235,  
PDB\_00362, SPR\_00215, SPR\_00395, SPR\_00452, SPR\_00331, SPR\_00498,  
SPR\_00139, SPR\_00489, SPR\_00504, SPR\_00044, SPR\_00163, SPR\_00200,  
SPR\_00356, SPR\_00391, SPR\_00416, SPR\_00227, SPR\_00271, SPR\_00023,  
SPR\_00090, SPR\_00221, SPR\_00297, SPR\_00156, SPR\_00393, SPR\_00164,  
SPR\_00550, SPR\_00867, SPR\_00112, SPR\_00137, SPR\_00138, SPR\_00506,  
SPR\_00155, SPR\_00548, SPR\_00064, SPR\_00124, SPR\_00552, SPR\_00113,  
PDB\_00474, SPR\_00070, SPR\_00117, SPR\_00279, SPR\_00467, SPR\_00327,  
SPR\_00632, SPR\_00487, SPR\_00263, SPR\_00025, SPR\_00541, SPR\_00426,  
SPR\_00414, SPR\_00496, SPR\_00236, SPR\_00220, SPR\_00385, SPR\_00436,  
SPR\_00520, SPR\_00390, SPR\_00542, NDB\_00051, SPR\_00478, SPR\_00020,  
SPR\_00226, SPR\_00153, SPR\_01157, SPR\_00276, SPR\_00209, SPR\_00370,  
SPR\_00294, SPR\_00633, SPR\_00389, SPR\_00089, SPR\_00359, SPR\_00017,  
SPR\_00497, PDB\_00327, SPR\_00224, SPR\_00369, SPR\_00513, SPR\_00115,  
SPR\_00033, SPR\_00357, SPR\_00557, SPR\_00013, SPR\_00593, SPR\_00373,  
SPR\_00333, SPR\_00758, SPR\_00598, SPR\_00402, SPR\_00298, SPR\_00459,  
SPR\_00229, SPR\_00353, SPR\_00519, SPR\_00750, SPR\_00760, SPR\_00228,  
SPR\_00086, PDB\_01001, SPR\_00512, SPR\_01117, SPR\_00289, SPR\_00437,  
SPR\_00177, SPR\_00219, SPR\_00273, SPR\_00007, SPR\_00065, SPR\_00418,  
SPR\_00352, SPR\_01095, SPR\_00026, SPR\_00321, SPR\_00483, SPR\_00610,  
SPR\_00913, SPR\_01051, SPR\_00088, SPR\_00461, SPR\_00095, SPR\_00810,  
SPR\_00434, SPR\_00912, SPR\_00178, SPR\_00022, SPR\_00481, SPR\_00009,  
SPR\_00318, SPR\_00445, SPR\_00620, SPR\_00246, SPR\_00456, SPR\_00029,  
SPR\_00167, SPR\_01106, SPR\_00068, PDB\_00070, SPR\_00374, SPR\_00518,  
SPR\_00114, SPR\_00358, SPR\_00027, SPR\_00320, SPR\_00721, SPR\_00561,  
SPR\_00479, PDB\_00667, PDB\_01009, SPR\_00415, SPR\_00329, SPR\_00493,  
PDB\_01002, SPR\_00079, SPR\_00957, SPR\_00455, SPR\_00010, SPR\_00111,  
PDB\_00229, PDB\_00392, SPR\_00482, SPR\_00868, SPR\_00438, SPR\_00032,  
SPR\_00502, SPR\_00012, SPR\_00087, SPR\_00223, SPR\_00590, SPR\_00505,  
PDB\_01053, SPR\_00091, SPR\_01143, SPR\_00339, SPR\_00191, SPR\_00816,  
SPR\_00317, PDB\_00402, SPR\_00544, SPR\_00595, SPR\_00045, SPR\_00777,  
SPR\_00309, SPR\_00517, SPR\_00080, PDB\_00313, SPR\_00016, SPR\_01088,  
PDB\_00431, SPR\_00435, SPR\_00213, SPR\_00066, SPR\_00176, PDB\_00425,  
PDB\_00430, SPR\_00388, SPR\_00036, SPR\_00458, PDB\_00571, SPR\_00225,  
SPR\_00277, SPR\_00074, SPR\_00932, SPR\_00943, SPR\_00360, SPR\_00060,

SPR\_00394, SPR\_00462, SPR\_00533, SPR\_00439, SPR\_00121, SPR\_00141,  
SPR\_00509, SPR\_01040, SPR\_00218, SPR\_00316, SPR\_00386)

**RNaseP\_bact\_a**

**201** (ASE\_00250, ASE\_00263, ASE\_00431, ASE\_00342, ASE\_00029,  
ASE\_00299, ASE\_00077, ASE\_00092, ASE\_00414, ASE\_00370, ASE\_00129,  
ASE\_00367, ASE\_00229, ASE\_00037, ASE\_00069, ASE\_00140, ASE\_00044,  
ASE\_00203, ASE\_00151, ASE\_00035, ASE\_00105, ASE\_00142, ASE\_00402,  
ASE\_00241, ASE\_00274, ASE\_00198, ASE\_00296, ASE\_00042, ASE\_00197,  
ASE\_00383, ASE\_00174, ASE\_00170, ASE\_00040, ASE\_00023, ASE\_00212,  
ASE\_00415, ASE\_00343, ASE\_00369, ASE\_00242, ASE\_00282, ASE\_00078,  
ASE\_00118, ASE\_00284, ASE\_00286, ASE\_00363, ASE\_00416, ASE\_00005,  
ASE\_00231, ASE\_00217, ASE\_00021, ASE\_00437, ASE\_00375, ASE\_00295,  
ASE\_00076, ASE\_00339, ASE\_00082, ASE\_00406, ASE\_00281, ASE\_00288,  
ASE\_00413, ASE\_00122, ASE\_00447, ASE\_00066, ASE\_00227, ASE\_00032,  
ASE\_00332, ASE\_00125, ASE\_00134, ASE\_00379, ASE\_00146, ASE\_00031,  
ASE\_00400, ASE\_00128, ASE\_00104, ASE\_00228, ASE\_00185, ASE\_00259,  
ASE\_00182, ASE\_00020, ASE\_00422, ASE\_00255, ASE\_00376, ASE\_00254,  
ASE\_00081, ASE\_00137, ASE\_00018, ASE\_00232, ASE\_00387, ASE\_00403,  
ASE\_00361, ASE\_00385, ASE\_00401, PDB\_00919, ASE\_00096, ASE\_00216,  
ASE\_00448, ASE\_00353, ASE\_00221, ASE\_00102, ASE\_00380, ASE\_00139,  
ASE\_00283, ASE\_00285, ASE\_00364, ASE\_00279, ASE\_00426, ASE\_00366,  
ASE\_00287, ASE\_00398, ASE\_00119, ASE\_00080, ASE\_00377, ASE\_00423,  
ASE\_00004, ASE\_00176, ASE\_00214, ASE\_00007, ASE\_00180, ASE\_00135,  
ASE\_00090, ASE\_00012, ASE\_00412, ASE\_00397, ASE\_00123, ASE\_00404,  
ASE\_00172, ASE\_00451, ASE\_00297, ASE\_00033, ASE\_00183, ASE\_00396,  
ASE\_00099, ASE\_00087, ASE\_00184, ASE\_00026, ASE\_00169, ASE\_00083,  
ASE\_00074, ASE\_00107, ASE\_00053, ASE\_00438, ASE\_00240, ASE\_00041,  
ASE\_00270, ASE\_00248, ASE\_00075, ASE\_00388, ASE\_00374, ASE\_00036,  
ASE\_00038, ASE\_00384, ASE\_00052, ASE\_00267, ASE\_00430, ASE\_00112,  
ASE\_00428, ASE\_00362, ASE\_00386, ASE\_00372, ASE\_00234, ASE\_00277,  
ASE\_00411, ASE\_00393, ASE\_00292, ASE\_00340, ASE\_00289, ASE\_00294,  
ASE\_00419, ASE\_00238, ASE\_00298, ASE\_00068, ASE\_00064, ASE\_00046,  
ASE\_00441, ASE\_00179, ASE\_00394, ASE\_00006, ASE\_00175, ASE\_00084,  
ASE\_00131, ASE\_00257, ASE\_00165, ASE\_00252, ASE\_00163, ASE\_00136,  
ASE\_00030, ASE\_00280, ASE\_00057, ASE\_00115, ASE\_00047, ASE\_00126,  
ASE\_00138, ASE\_00186, ASE\_00395, ASE\_00181, ASE\_00215, ASE\_00171,  
ASE\_00132, ASE\_00079, ASE\_00390, ASE\_00382)

**Bacteria\_small\_SRP**

**84** (SRP\_00081, SRP\_00365, SRP\_00269, SRP\_00356, SRP\_00072, SRP\_00056,  
SRP\_00146, SRP\_00273, SRP\_00357, SRP\_00325, SRP\_00105, SRP\_00383,  
SRP\_00077, SRP\_00020, SRP\_00285, SRP\_00094, SRP\_00227, SRP\_00084,  
SRP\_00326, SRP\_00132, SRP\_00121, SRP\_00067, SRP\_00266, SRP\_00233,  
SRP\_00162, SRP\_00075, SRP\_00215, SRP\_00043, SRP\_00194, SRP\_00217,  
SRP\_00229, SRP\_00251, SRP\_00274, SRP\_00312, SRP\_00369, SRP\_00054,  
SRP\_00008, SRP\_00219, SRP\_00057, SRP\_00358, SRP\_00137, SRP\_00315,  
SRP\_00095, SRP\_00161, SRP\_00367, SRP\_00051, SRP\_00107, SRP\_00271,  
SRP\_00170, SRP\_00318, SRP\_00310, SRP\_00342, SRP\_00200, SRP\_00044,

SRP\_00350, SRP\_00303, SRP\_00268, SRP\_00098, SRP\_00244, SRP\_00209, SRP\_00270, SRP\_00243, SRP\_00042, SRP\_00295, SRP\_00250, SRP\_00145, SRP\_00074, SRP\_00213, SRP\_00038, SRP\_00338, SRP\_00163, SRP\_00341, SRP\_00040, SRP\_00128, SRP\_00324, SRP\_00164, SRP\_00222, SRP\_00058, SRP\_00363, SRP\_00046, SRP\_00216, SRP\_00231, SRP\_00141, SRP\_00333)

**5S\_rRNA** **70** (CRW\_00567, CRW\_01540, CRW\_00573, CRW\_01482, CRW\_01536, CRW\_01625, CRW\_01620, CRW\_01542, CRW\_01606, CRW\_01573, CRW\_01617, CRW\_01487, CRW\_01539, CRW\_01613, CRW\_01623, CRW\_01504, CRW\_01537, CRW\_01556, CRW\_01562, CRW\_01492, CRW\_01616, CRW\_01584, CRW\_01605, CRW\_01569, CRW\_01497, CRW\_01532, CRW\_01508, CRW\_01499, CRW\_01603, CRW\_01572, CRW\_01484, CRW\_01485, CRW\_01563, CRW\_01583, CRW\_01535, CRW\_01568, CRW\_01621, CRW\_01534, CRW\_01570, CRW\_01494, CRW\_01581, CRW\_01608, CRW\_01501, CRW\_01521, CRW\_01493, CRW\_00555, CRW\_01566, CRW\_01533, CRW\_01502, CRW\_00548, CRW\_01496, CRW\_01557, CRW\_01578, CRW\_01500, CRW\_01498, CRW\_01489, CRW\_01491, CRW\_01593, CRW\_01559, CRW\_01544, CRW\_01590, CRW\_00552, CRW\_01599, CRW\_01595, CRW\_00570, CRW\_01555, CRW\_01507, CRW\_01580, CRW\_01548, CRW\_01541)

**SSU\_rRNA\_bacteria** **52** (CRW\_00034, CRW\_00280, CRW\_00048, CRW\_00245, CRW\_00150, PDB\_01105, CRW\_00279, CRW\_00273, CRW\_00289, CRW\_00466, CRW\_00059, CRW\_00284, CRW\_00141, PDB\_01273, CRW\_00196, PDB\_00854, CRW\_00275, CRW\_00997, CRW\_00256, CRW\_00277, CRW\_00250, CRW\_00068, CRW\_00096, CRW\_00270, CRW\_00152, CRW\_00789, CRW\_00292, CRW\_00061, PDB\_01120, CRW\_00591, CRW\_00166, CRW\_00283, PDB\_01103, CRW\_00778, CRW\_00590, CRW\_00248, CRW\_00772, CRW\_00278, CRW\_00589, CRW\_00285, CRW\_00271, CRW\_00281, CRW\_00140, CRW\_00177, PDB\_01088, CRW\_00763, CRW\_00173, PDB\_00703, CRW\_00054, CRW\_00230, CRW\_00795, CRW\_00849)

**Metazoa\_SRP** **31** (SRP\_00257, SRP\_00124, SRP\_00260, SRP\_00328, SRP\_00317, SRP\_00340, SRP\_00103, SRP\_00368, SRP\_00329, SRP\_00267, SRP\_00331, SRP\_00282, SRP\_00252, SRP\_00299, SRP\_00002, SRP\_00171, SRP\_00102, SRP\_00247, SRP\_00347, SRP\_00117, SRP\_00053, SRP\_00253, SRP\_00061, SRP\_00050, SRP\_00066, SRP\_00086, SRP\_00228, SRP\_00060, SRP\_00300, SRP\_00006, SRP\_00123)

**SSU\_rRNA\_eukarya** **29** (CRW\_00386, CRW\_00414, CRW\_00366, CRW\_00759, CRW\_00310, CRW\_00758, CRW\_00301, CRW\_00379, CRW\_00370, CRW\_00306, CRW\_00358, CRW\_00403, CRW\_00333, CRW\_00326, CRW\_00345, CRW\_00760, CRW\_00298, CRW\_01171, CRW\_01153, CRW\_00348, CRW\_01300, CRW\_00371, CRW\_00598, CRW\_00372, CRW\_00346, CRW\_00800, CRW\_00411, CRW\_00332, CRW\_00330)

**Hammerhead\_1** **27** (RFA\_00703, RFA\_00678, RFA\_00664, RFA\_00716, RFA\_00659, RFA\_00677, RFA\_00711, RFA\_00695, RFA\_00667, RFA\_00668, RFA\_00684, RFA\_00709, RFA\_00673, RFA\_00717, RFA\_00672, RFA\_00706, RFA\_00705,

RFA\_00685, RFA\_00674, RFA\_00704, RFA\_00710, RFA\_00658, RFA\_00707, RFA\_00675, RFA\_00680, RFA\_00708, RFA\_00715)

**Fungi\_SRP** 27 (SRP\_00294, SRP\_00254, SRP\_00290, SRP\_00160, SRP\_00136, SRP\_00018, SRP\_00292, SRP\_00371, SRP\_00301, SRP\_00287, SRP\_00069, SRP\_00104, SRP\_00070, SRP\_00158, SRP\_00157, SRP\_00230, SRP\_00091, SRP\_00382, SRP\_00073, SRP\_00302, SRP\_00286, SRP\_00019, SRP\_00265, SRP\_00087, SRP\_00175, SRP\_00127, SRP\_00148)

**RNaseP\_nuc** 26 (ASE\_00303, ASE\_00420, ASE\_00153, ASE\_00454, ASE\_00251, ASE\_00338, ASE\_00247, ASE\_00245, ASE\_00246, ASE\_00258, ASE\_00017, ASE\_00108, ASE\_00111, ASE\_00329, ASE\_00330, ASE\_00427, ASE\_00168, ASE\_00316, ASE\_00025, ASE\_00443, ASE\_00100, ASE\_00313, ASE\_00237, ASE\_00327, ASE\_00264, ASE\_00337)

**RNaseP\_arch** 24 (ASE\_00210, ASE\_00001, ASE\_00418, ASE\_00213, ASE\_00145, ASE\_00205, ASE\_00002, ASE\_00191, ASE\_00360, ASE\_00148, ASE\_00154, ASE\_00014, ASE\_00209, ASE\_00359, ASE\_00346, ASE\_00009, ASE\_00196, ASE\_00121, ASE\_00222, ASE\_00116, ASE\_00417, ASE\_00187, ASE\_00120, ASE\_00155)

**Archaea\_SRP** 23 (SRP\_00199, SRP\_00143, SRP\_00321, SRP\_00323, SRP\_00142, SRP\_00144, SRP\_00016, SRP\_00322, SRP\_00330, SRP\_00201, SRP\_00197, SRP\_00198, SRP\_00339, SRP\_00332, SRP\_00278, SRP\_00276, SRP\_00204, SRP\_00202, SRP\_00206, SRP\_00208, SRP\_00203, SRP\_00255, SRP\_00130)

**Intron\_gpl** 19 (CRW\_00619, CRW\_00672, CRW\_00620, CRW\_00614, CRW\_00013, CRW\_00613, CRW\_00016, CRW\_00633, CRW\_00671, CRW\_00621, CRW\_00674, CRW\_00623, CRW\_00610, CRW\_00634, CRW\_00676, PDB\_00827, CRW\_00692, CRW\_00670, CRW\_00618)

**Plant\_SRP** 19 (SRP\_00239, SRP\_00009, SRP\_00085, SRP\_00099, SRP\_00012, SRP\_00184, SRP\_00079, SRP\_00240, SRP\_00188, SRP\_00011, SRP\_00241, SRP\_00181, SRP\_00361, SRP\_00152, SRP\_00153, SRP\_00015, SRP\_00182, SRP\_00178, SRP\_00179)

**Bacteria\_large\_SRP** 18 (SRP\_00026, SRP\_00089, SRP\_00106, SRP\_00134, SRP\_00088, SRP\_00173, SRP\_00001, SRP\_00030, SRP\_00174, SRP\_00337, SRP\_00031, SRP\_00308, SRP\_00024, SRP\_00090, SRP\_00234, SRP\_00335, SRP\_00027, SRP\_00037)

**Hammerhead\_3** 17 (RFA\_00446, RFA\_00449, RFA\_00389, RFA\_00434, RFA\_00396, RFA\_00436, RFA\_00402, RFA\_00391, RFA\_00409, RFA\_00444, RFA\_00427, RFA\_00425, RFA\_00390, RFA\_00442, RFA\_00416, RFA\_00433, RFA\_00440)

**RNaseP\_bact\_b** 17 (ASE\_00328, ASE\_00010, ASE\_00305, ASE\_00194, ASE\_00045, ASE\_00335, ASE\_00321, ASE\_00189, ASE\_00318, ASE\_00022, ASE\_00028, ASE\_00434, ASE\_00204, ASE\_00114, ASE\_00161, ASE\_00192, ASE\_00190)

**s2m** 14 (RFA\_00745, RFA\_00734, RFA\_00736, RFA\_00731, RFA\_00762, RFA\_00733, RFA\_00730, RFA\_00749, RFA\_00764, RFA\_00758, RFA\_00737, RFA\_00763, PDB\_00810, RFA\_00765)

**Telomerase-cil** 12 (RFA\_00615, RFA\_00607, RFA\_00613, RFA\_00606, RFA\_00609, PDB\_01051, RFA\_00611, RFA\_00605, RFA\_00603, RFA\_00610, RFA\_00604, RFA\_00620)

**Y\_RNA** 10 (RFA\_00587, RFA\_00588, RFA\_00584, RFA\_00585, RFA\_00583, RFA\_00589, RFA\_00586, RFA\_00596, RFA\_00582, RFA\_00594)

|                         |                                                                                                   |
|-------------------------|---------------------------------------------------------------------------------------------------|
| <b>Vimentin3</b>        | <b>8</b> (RFA_00653, RFA_00654, RFA_00643, RFA_00644, RFA_00642, RFA_00645, RFA_00649, RFA_00651) |
| <b>R2_retro_el</b>      | <b>6</b> (RFA_00816, RFA_00819, RFA_00817, RFA_00814, RFA_00818, RFA_00815)                       |
| <b>Gammaretro_CES</b>   | <b>6</b> (RFA_00781, RFA_00791, RFA_00801, RFA_00786, PDB_00213, RFA_00792)                       |
| <b>Telomerase-vert</b>  | <b>6</b> (RFA_00599, RFA_00602, RFA_00601, RFA_00597, RFA_00600, RFA_00598)                       |
| <b>Corona_pk3</b>       | <b>6</b> (RFA_00769, RFA_00773, RFA_00767, RFA_00768, RFA_00779, RFA_00770)                       |
| <b>rne5</b>             | <b>4</b> (RFA_00628, RFA_00627, RFA_00626, RFA_00630)                                             |
| <b>HDV_ribozyme</b>     | <b>3</b> (PDB_00716, RFA_00636, RFA_00632)                                                        |
| <b>RNase_MRP</b>        | <b>3</b> (RFA_00621, RFA_00624, RFA_00623)                                                        |
| <b>Purine</b>           | <b>3</b> (PDB_01020, PDB_00829, PDB_00828)                                                        |
| <b>SSU_rRNA_archaea</b> | <b>2</b> (CRW_00024, CRW_01343)                                                                   |
| <b>mir-TAR</b>          | <b>2</b> (PDB_00553, PDB_00012)                                                                   |
| <b>RydC</b>             | <b>2</b> (RFA_00809, RFA_00808)                                                                   |
| <b>bicoid_3</b>         | <b>2</b> (RFA_00830, RFA_00820)                                                                   |
| <b>HIV_FE</b>           | <b>1</b> (PDB_00876)                                                                              |
| <b>ykoK</b>             | <b>1</b> (PDB_01236)                                                                              |
| <b>UnaL2</b>            | <b>1</b> (PDB_01050)                                                                              |
| <b>SAM</b>              | <b>1</b> (PDB_01073)                                                                              |
| <b>Entero_5_CRE</b>     | <b>1</b> (PDB_00741)                                                                              |
| <b>HIV_FS2</b>          | <b>1</b> (PDB_01152)                                                                              |
| <b>TPP</b>              | <b>1</b> (PDB_01114)                                                                              |
| <b>glmS</b>             | <b>1</b> (PDB_01092)                                                                              |
| <b>Tymo_tRNA-like</b>   | <b>1</b> (PDB_00005)                                                                              |
| <b>7SK</b>              | <b>1</b> (RFA_00639)                                                                              |
| <b>RNAIII</b>           | <b>1</b> (RFA_00805)                                                                              |
| <b>Not assigned</b>     | <b>745</b>                                                                                        |
| <b>Total:</b>           | <b>1987 RNA chains</b>                                                                            |
